# Supplementary material for: Genomics Analysis Reveals the Potential Biocontrol Mechanism of Pseudomonas aeruginosa QY43 against Fusarium pseudograminearum
Source: MDPI journal article supplement (doi:10.3390/jof10040298), 2024-04-21
Supplement: s1 [file s1]

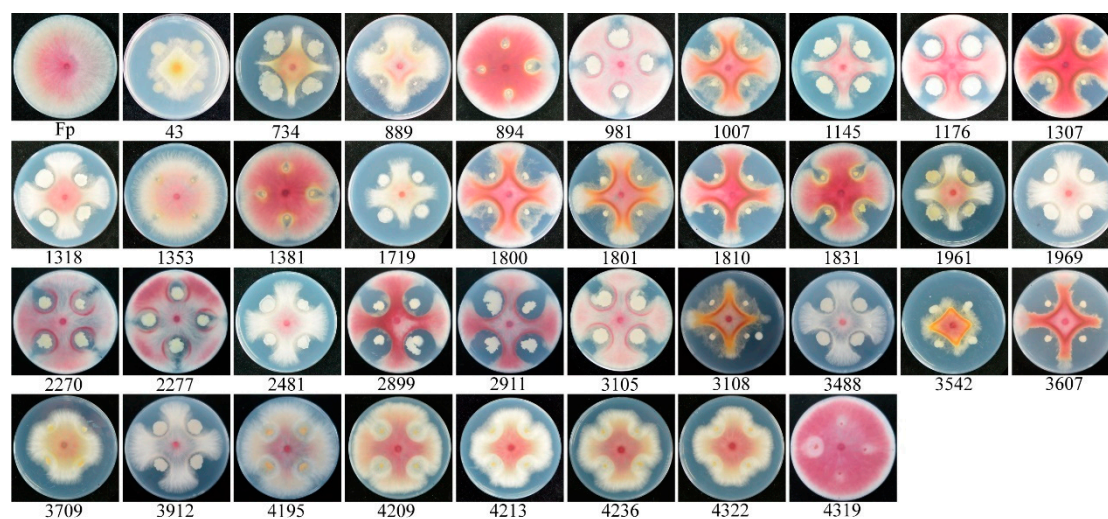

**Figure S1.** Confrontation culture of the 37 isolated strains and *Fusarium pseudograminearum* WZ-8A (Fp) on potato dextrose agar (PDA) plates. Colony morphology of WZ-8A on a PDA plate with or without biocontrol bacteria.

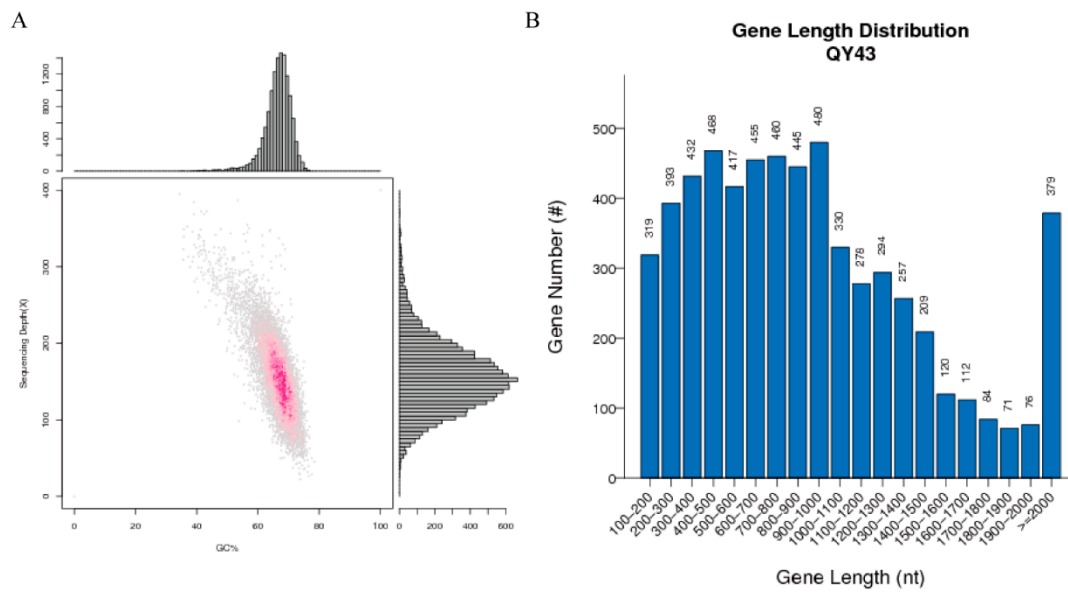

**Figure S2.** QY43 genomics including GC-depth analysis and gene length distribution. (A): GC content and depth correlative analysis. The GC content and average depth were calculated with 500 bp as the window without repetition, and the GC bias of the sequencing data was analyzed based on these results; (B): Gene length distribution.

**Table S1.** List of genes related to antagonistic activity and plant growth promotion (PGP) attributes from the isolated *P. aeruginosa* QY43 genome.

| Biological control mechanism     | Gene Name    | Protein Names                                                                                 |
|----------------------------------|--------------|-----------------------------------------------------------------------------------------------|
| antagonistic activities          |              |                                                                                               |
| Phenazine-1-carboxamide acid PCA | QY43GL000735 | ( <i>phzG1</i> ) probable pyrodoxamine 5'-phosphate oxidase                                   |
|                                  | QY43GL000736 | ( <i>phzF1</i> ) putative phenazine biosynthesis protein                                      |
|                                  | QY43GL000737 | ( <i>phzE1</i> ) phenazine biosynthesis protein PhzE                                          |
|                                  | QY43GL000738 | ( <i>phzD1</i> ) phenazine biosynthesis protein PhzD, isochorismatase                         |
|                                  | QY43GL000739 | ( <i>phzC1</i> ) phenazine biosynthesis protein PhzC                                          |
|                                  | QY43GL000740 | ( <i>phzB1</i> ) probable phenazine biosynthesis protein                                      |
|                                  | QY43GL000741 | ( <i>phzA1</i> ) phenazine biosynthesis protein PhzA                                          |
|                                  | QY43GL002160 | ( <i>phzC1</i> ) phenazine biosynthesis protein PhzC                                          |
|                                  | QY43GL003291 | ( <i>phzG1</i> ) probable pyrodoxamine 5'-phosphate oxidase                                   |
|                                  | QY43GL003292 | ( <i>phzF1</i> ) phenazine biosynthesis protein PhzF, isomerase                               |
|                                  | QY43GL003293 | ( <i>phzE1</i> ) phenazine biosynthesis protein PhzE                                          |
|                                  | QY43GL003294 | ( <i>phzC1</i> ) phenazine biosynthesis protein PhzC                                          |
|                                  | QY43GL003295 | ( <i>phzD1</i> ) phenazine biosynthesis protein PhzD, isochorismatase                         |
|                                  | QY43GL003296 | ( <i>phzB2</i> ) probable phenazine biosynthesis protein                                      |
|                                  | QY43GL003297 | ( <i>phzA2</i> ) probable phenazine biosynthesis protein                                      |
| Pyocyanin PYO                    | QY43GL000742 | ( <i>phzM</i> ) phenazine-specific methyltransferase PhzM                                     |
|                                  | QY43GL000734 | ( <i>phzS</i> ) flavin-containing monooxygenase                                               |
| Phenazine-1-carboxamide PCN      | QY43GL000054 | ( <i>phzH</i> ) potential phenazine-modifying enzyme                                          |
|                                  | QY43GL003102 | ( <i>phzH</i> ) potential phenazine-modifying enzyme                                          |
| 1-Hydroxyphenazine               | QY43GL000734 | ( <i>phzS</i> ) flavin-containing monooxygenase                                               |
| Rhamnolipid                      | QY43GL004214 | ( <i>rhlC</i> ) rhamnosyltransferase 2                                                        |
|                                  | QY43GL004646 | ( <i>rhlA</i> ) rhamnosyltransferase chain A                                                  |
|                                  | QY43GL001502 | ( <i>rhlA</i> ) rhamnosyltransferase chain A                                                  |
|                                  | QY43GL001503 | ( <i>rhlB</i> ) rhamnosyltransferase chain B                                                  |
|                                  | QY43GL001504 | ( <i>rhlR</i> ) transcriptional regulator RhlR                                                |
| Exopolysaccharides               | QY43GL000985 | ( <i>algK</i> ) Sel1-like repeat protein                                                      |
|                                  | QY43GL001449 | ( <i>algA</i> ) phosphomannose isomerase / guanosine 5'-diphospho-D-mannose pyrophosphorylase |
|                                  | QY43GL001450 | ( <i>algF</i> ) alginate o-acetyltransferase AlgF                                             |
|                                  | QY43GL001451 | ( <i>algJ</i> ) alginate o-acetyltransferase AlgJ                                             |
|                                  | QY43GL001452 | ( <i>algI</i> ) alginate o-acetyltransferase AlgI                                             |
|                                  | QY43GL001453 | ( <i>algL</i> ) poly(beta-d-mannuronate) lyase precursor AlgL                                 |
|                                  | QY43GL001455 | ( <i>algX</i> ) alginate biosynthesis protein AlgX                                            |
|                                  | QY43GL001456 | ( <i>algG</i> ) outer membrane protein AlgE                                                   |
|                                  | QY43GL001457 | ( <i>algE</i> ) Alginate production outer membrane protein AlgE precursor                     |
|                                  | QY43GL001458 | ( <i>algK</i> ) alginate biosynthesis protein Alg44                                           |
|                                  | QY43GL001459 | ( <i>alg44</i> ) alginate biosynthesis protein Alg8                                           |
|                                  | QY43GL001460 | ( <i>alg8</i> ) alginate biosynthesis protein Alg8                                            |
|                                  | QY43GL001461 | ( <i>algD</i> ) GDP-mannose 6-dehydrogenase AlgD                                              |
|                                  | QY43GL003958 | ( <i>algB</i> ) two-component response regulator AlgB                                         |
|                                  | QY43GL004611 | ( <i>algU</i> ) alginate biosynthesis protein AlgZ/FimS                                       |

| Biological control mechanism | Gene Name    | Protein Names                                                                                |
|------------------------------|--------------|----------------------------------------------------------------------------------------------|
|                              | QY43GL004879 | ( <i>algW</i> ) AlgW protein                                                                 |
|                              | QY43GL005552 | ( <i>algP/algR3</i> ) alginate regulatory protein AlgP                                       |
|                              | QY43GL005755 | ( <i>algQ</i> ) Alginate regulatory protein AlgQ                                             |
|                              | QY43GL005761 | ( <i>algR</i> ) alginate biosynthesis regulatory protein AlgR                                |
|                              | QY43GL005762 | ( <i>algZ</i> ) sigma factor AlgU                                                            |
|                              | QY43GL005823 | ( <i>algC</i> ) phosphomannomutase AlgC                                                      |
|                              | QY43GL005993 | ( <i>algB</i> ) two-component response regulator AlgB                                        |
| antagonistic activities      |              |                                                                                              |
| Salicylate                   | QY43GL000720 | ( <i>pchA</i> ) salicylate biosynthesis isochorismate synthase PchA                          |
|                              | QY43GL000721 | ( <i>pchB</i> ) salicylate biosynthesis protein PchB                                         |
| Siderophores production      |              |                                                                                              |
| Pyochelin                    | QY43GL000722 | ( <i>pchC</i> ) pyochelin biosynthetic protein PchC                                          |
|                              | QY43GL000723 | ( <i>pchD</i> ) pyochelin biosynthesis protein PchD                                          |
|                              | QY43GL000728 | ( <i>pchH</i> ) putative ATP-binding component of ABC transporter                            |
|                              | QY43GL000729 | ( <i>pchI</i> ) putative ATP-binding component of ABC transporter                            |
|                              | QY43GL000726 | ( <i>pchF</i> ) pyochelin synthetase PchF                                                    |
|                              | QY43GL000727 | ( <i>pchG</i> ) pyochelin biosynthetic protein PchG                                          |
|                              | QY43GL000724 | ( <i>pchR</i> ) transcriptional regulator PchR                                               |
| Pyoverdine                   | QY43GL002741 | ( <i>pvdG</i> ) PvdG                                                                         |
|                              | QY43GL002763 | ( <i>pvdG</i> ) putative thioesterase                                                        |
|                              | QY43GL002772 | ( <i>pvdI</i> ) probable non-ribosomal peptide synthetase                                    |
|                              | QY43GL002773 | ( <i>pvdJ</i> ) PvdJ                                                                         |
|                              | QY43GL002774 | ( <i>pvdD</i> ) pyoverdine synthetase D                                                      |
|                              | QY43GL002777 | ( <i>pvdF</i> ) pyoverdine synthetase F                                                      |
|                              | QY43GL002788 | ( <i>pvdA</i> ) L-ornithine N5-oxygenase                                                     |
| Biofilm Formation            | QY43GL001637 | ( <i>flgN</i> ) putative export chaperone involved in flagellar synthesis                    |
|                              | QY43GL001638 | ( <i>flgM</i> ) negative regulator of flagellin synthesis                                    |
|                              | QY43GL001639 | ( <i>flgA</i> ) flagellar basal body P-ring biosynthesis protein FlgA                        |
|                              | QY43GL004272 | ( <i>flgL</i> ) flagellar hook-associated protein 3                                          |
|                              | QY43GL004273 | ( <i>flgK</i> ) flagellar hook-associated protein FlgK                                       |
|                              | QY43GL004274 | ( <i>flgJ</i> ) flagellar protein FlgJ                                                       |
|                              | QY43GL004275 | ( <i>flgI</i> ) flagellar P-ring protein precursor FlgI                                      |
|                              | QY43GL004276 | ( <i>flgH</i> ) flagellar L-ring protein precursor FlgH                                      |
|                              | QY43GL004277 | ( <i>flgG</i> ) flagellar basal-body rod protein FlgG                                        |
|                              | QY43GL004278 | ( <i>flgF</i> ) flagellar basal-body rod protein FlgF                                        |
|                              | QY43GL004279 | ( <i>flgE</i> ) flagellar hook protein FlgE                                                  |
|                              | QY43GL004280 | ( <i>flgD</i> ) flagellar basal-body rod modification protein FlgD                           |
|                              | QY43GL004281 | ( <i>flgC</i> ) flagellar basal-body rod protein FlgC                                        |
|                              | QY43GL004282 | ( <i>flgB</i> ) flagellar basal body rod protein FlgB                                        |
| (PGP) attributes             |              |                                                                                              |
| Phosphate metabolism         | QY43GL004163 | ( <i>phoQ</i> ) hypothetical protein                                                         |
|                              | QY43GL004164 | ( <i>phoP</i> ) transcriptional regulatory protein PhoP, regulator of virulence determinants |

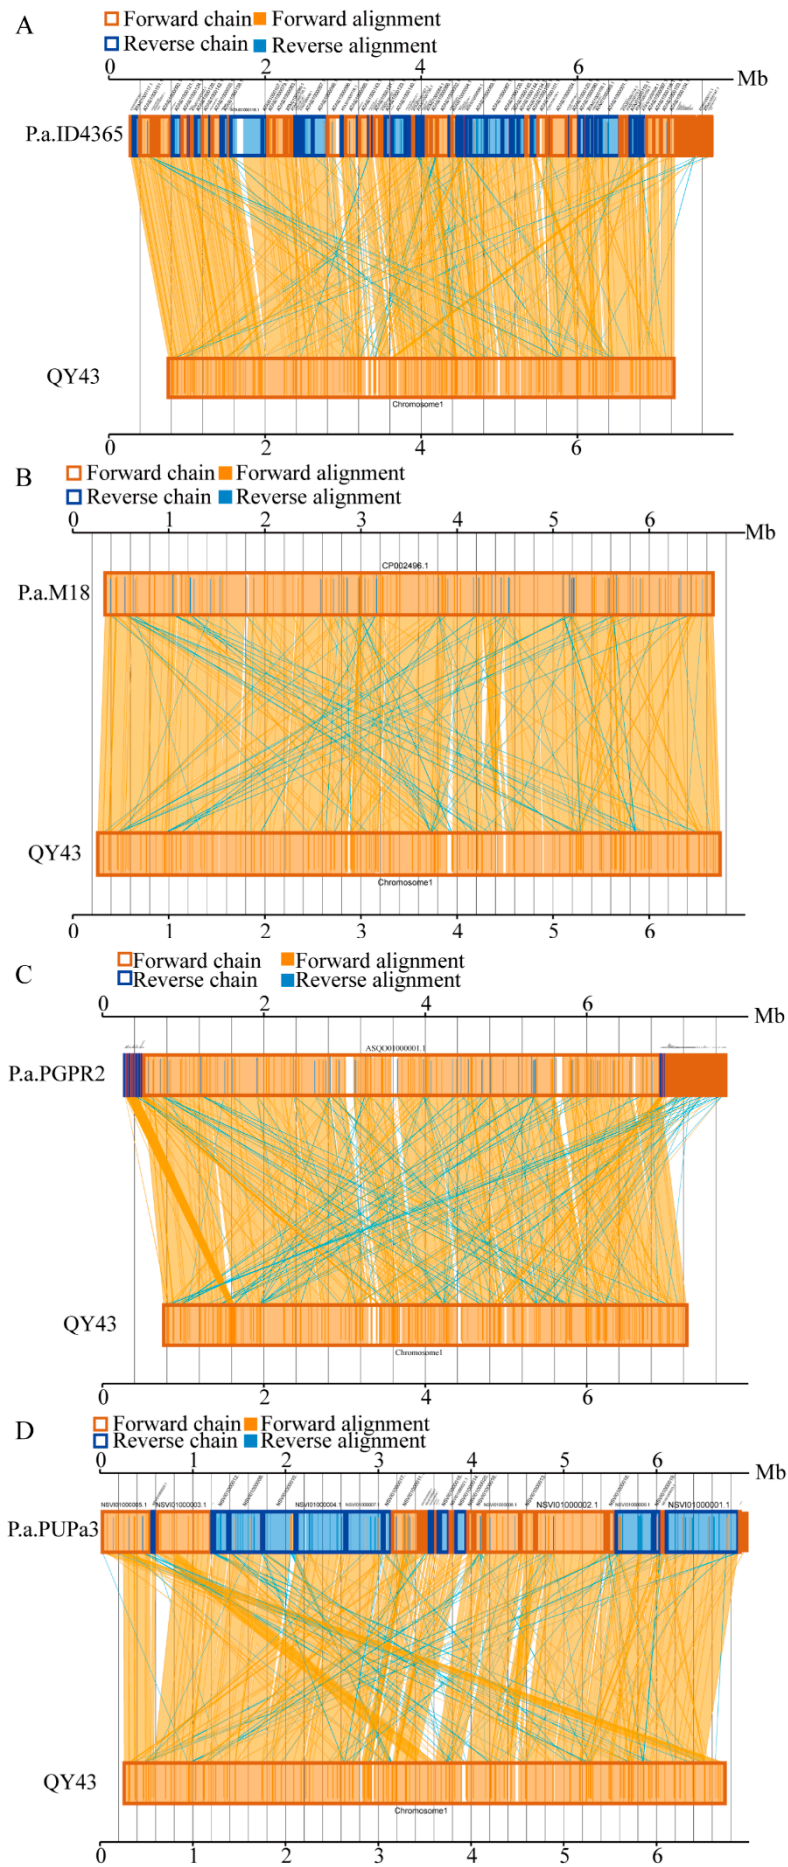

**Figure S3.** Comparative genomics analysis of QY43 with ID4365, M18, PGPR2, and PUPa3. (A): QY43, ID4365 nucleic acid level synteny; (B): QY43, M18 nucleic acid level synteny; (C): QY43, PGPR2 nucleic acid level synteny; (D): QY43, PUPa3 nucleic acid level synteny. The lower sequence represents the tested genome, whereas the upper sequence represents the reference sequence genome. Yellow and blue boxes in both sequences indicate the positive and negative strands of the genome, respectively. Yellow and blue areas within the boxes represent the nucleotide sequences of this genomic region in the positive and negative strands, respectively. Yellow and blue lines in the middle region of the figure depict forward and reverse complement alignments, respectively.
